# Supplementary material for: A novel microporous Tb-MOF fluorescent sensor for highly selective and sensitive detection of picric acid
Source: Royal Society of Chemistry journal article supplement (doi:10.1039/c8ra02602e), 2018-01-01
Supplement: c8ra02602e1.pdf [file c8ra02602e1.pdf]

## Supporting Information

### A novel microporous Tb-MOF fluorescent sensor for highly selective and sensitive detection of picric acid

Ping Ju,<sup>‡ a</sup> Ensheng Zhang,<sup>‡\* a</sup> Long Jiang,<sup>b</sup> Ze Zhang,<sup>a</sup> Xiangyang Hou,<sup>a</sup> Yuqi Zhang,<sup>a</sup>

Hua Yang,<sup>a</sup> Jijiang Wang<sup>\* a</sup>

<sup>a</sup> Laboratory of New Energy & New Function Materials and Shaanxi Key Laboratory of Chemical Reaction Engineering, College of Chemistry and Chemical Engineering, Yan'an University, Yan'an, Shaanxi, 716000, P. R. China.

<sup>b</sup> MOE Key Laboratory of Bioinorganic and Synthetic Chemistry, School of Chemistry and Chemical Engineering, Sun Yat-Sen University, Guangzhou 510275, P. R. China.

E-mail address: sdzes2006@163.com; yadxwj@126.com

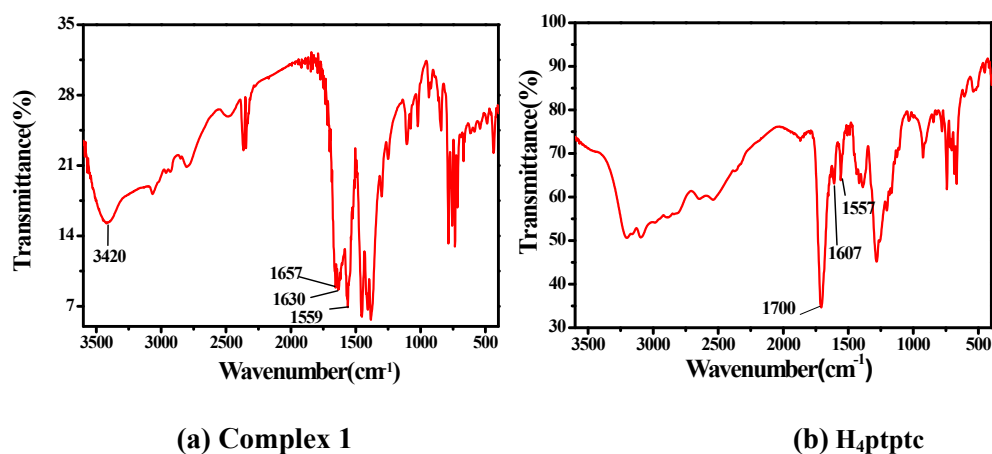

Fig. 1S IR spectrum of the complex 1 and H<sub>4</sub>ptpc

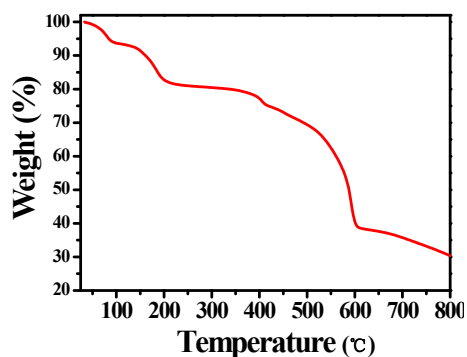

Fig. 2S TGA curve of complex 1

Table 1S. Selected Bond Lengths (Å) and Bond Angles (°)

| Bond                  | Dist.    | Bond                 | Dist.    | Bond                  | Dist.    |
|-----------------------|----------|----------------------|----------|-----------------------|----------|
| Tb(1)-O(1)            | 2.372(6) | Tb(1)-O(3)#1         | 2.476(7) | Tb(1)-O(4)#1          | 2.479(7) |
| Tb(1)-O(6)#3          | 2.268(7) | Tb(1)-O(9)           | 2.460(7) | Tb(1)-O(10)           | 2.438(7) |
| Tb(1)-O(15)#2         | 2.491(7) | Tb(1)-O(16)#2        | 2.456(7) | Tb(1)-O(17)           | 2.454(9) |
| Tb(2)-O(12) #5        | 2.503(7) | Tb(2)-O(8)#4         | 2.451(7) | Tb(2)-O(1W)           | 2.441(9) |
| Tb(2)-O(2)            | 2.340(7) | Tb(2)-O(5) #3        | 2.274(7) | Tb(2)-O(7)#4          | 2.432(7) |
| Tb(2)-O(11) #5        | 2.452(7) | Tb(2)-O(13)          | 2.411(7) | Tb(2)-O(14)           | 2.578(7) |
| Angle                 | (°)      | Angle                | (°)      | Angle                 | (°)      |
| O(1)-Tb(1)-O(3)#1     | 139.5(2) | O(1)-Tb(1)-O(4)#1    | 142.5(2) | O(1)-Tb(1)-O(9)       | 72.0(2)  |
| O(1)-Tb(1)-O(10)      | 73.1(2)  | O(1)-Tb(1)-O(15)#2   | 71.9(2)  | O(1)-Tb(1)-O(16)#2    | 81.8(2)  |
| O(1)-Tb(1)-O(17)      | 139.8(3) | O(3)#1-Tb(1)-O(4)#1  | 52.5(2)  | O(3)#1-Tb(1)-O(15)#2  | 131.2(2) |
| O(4)#1-Tb(1)-O(15)#2  | 132.4(2) | O(6)#3-Tb(1)-O(1)    | 83.1(3)  | O(6)#3-Tb(1)-O(3)#1   | 72.2(2)  |
| O(6)#3-Tb(1)-O(4)#1   | 124.5(2) | O(6)#3-Tb(1)-O(9)    | 139.2(3) | O(6)#3-Tb(1)-O(10)    | 88.7(3)  |
| O(6)#3-Tb(1)-O(15)#2  | 79.4(3)  | O(6)#3-Tb(1)-O(16)#2 | 132.2(3) | O(6)#3-Tb(1)-O(17)    | 88.0(3)  |
| O(9)-Tb(1)-O(3)#1     | 106.9(2) | O(9)-Tb(1)-O(4)#1    | 70.7(2)  | O(9)-Tb(1)-O(15)#2    | 120.4(2) |
| O(10)-Tb(1)-O(3)#1    | 74.7(2)  | O(10)-Tb(1)-O(4)#1   | 82.0(2)  | O(10)-Tb(1)-O(9)      | 53.6(2)  |
| O(10)-Tb(1)-O(15)#2   | 144.1(2) | O(10)-Tb(1)-O(16)#2  | 128.7(2) | O(10)-Tb(1)-O(17)     | 146.1(3) |
| O(16)#2-Tb(1)-O(3)#1  | 138.3(2) | O(16)#2-Tb(1)-O(4)#1 | 92.9(2)  | O(16)#2-Tb(1)-O(9)    | 76.4(2)  |
| O(16)#2-Tb(1)-O(15)#2 | 52.9(2)  | O(17)-Tb(1)-O(3)#1   | 72.1(3)  | O(17)-Tb(1)-O(4)#1    | 72.4(3)  |
| O(17)-Tb(1)-O(9)      | 131.6(3) | O(17)-Tb(1)-O(15)#2  | 67.9(3)  | O(17)-Tb(1)-O(16)#2   | 75.6(3)  |
| O(2)-Tb(2)-O(7)#4     | 73.1(2)  | O(2)-Tb(2)-O(8)#4    | 118.1(2) | O(2)-Tb(2)-O(11)#5    | 73.0(3)  |
| O(2)-Tb(2)-O(12)#5    | 123.1(2) | O(2)-Tb(2)-O(13)     | 153.4(3) | O(2)-Tb(2)-O(14)      | 122.1(2) |
| O(2)-Tb(2)-O(1W)      | 73.2(3)  | O(5)#3-Tb(2)-O(2)    | 83.6(3)  | O(5)#3-Tb(2)-O(7)#4   | 156.7(3) |
| O(5)#3-Tb(2)-O(8)#4   | 145.5(2) | O(5)#3-Tb(2)-O(11)#5 | 83.4(3)  | O(5)#3-Tb(2)-O(12)#5  | 74.5(2)  |
| O(5)#3-Tb(2)-O(13)    | 81.0(3)  | O(5)#3-Tb(2)-O(14)   | 122.4(3) | O(5)#3-Tb(2)-O(1W)    | 75.8(3)  |
| O(7)#4-Tb(2)-O(8)#4   | 53.5(2)  | O(7)#4-Tb(2)-O(11)#5 | 91.1(2)  | O(7)#4-Tb(2)-O(12)#5  | 119.6(2) |
| O(7)#4-Tb(2)-O(14)    | 71.2(2)  | O(7)#4-Tb(2)-O(1W)   | 95.5(3)  | O(8)#4-Tb(2)-O(11)#5  | 78.6(2)  |
| O(8)#4-Tb(2)-O(12)#5  | 71.2(2)  | O(8)#4-Tb(2)-O(14)   | 70.7(2)  | O(11)#5-Tb(2)-O(12)#5 | 53.0(2)  |
| O(11)#5-Tb(2)-O(14)   | 149.3(2) | O(12)#5-Tb(2)-O(14)  | 113.9(2) | O(13)-Tb(2)-O(14)     | 52.6(2)  |
| O(13)-Tb(2)-O(7)#4    | 119.8(2) | O(13)-Tb(2)-O(8)#4   | 86.1(2)  | O(13)-Tb(2)-O(11)#5   | 126.0(2) |
| O(13)-Tb(2)-O(12)#5   | 73.1(2)  | O(13)-Tb(2)-O(1W)    | 82.1(3)  | O(1W) -Tb(2)-O(8)#4   | 133.9(3) |
| O(1W) -Tb(2)-O(11)#5  | 141.9(3) | O(1W)-Tb(2)-O(12)#5  | 143.7(3) | O(1W) -Tb(2)-O(14)    | 66.8(3)  |

Symmetry codes: #1 -1+x,y,z; #2 -x,-y,-z+1; #3 x,-1+y,z; #4 x+1,-1+y,z; #5 1-x,-y, 2-z; #6 1+x,y,z; #7 -1+x,1+y,z; #8 1-x,1-y,2-z; #9 2-x,-1-y, 1-z; #10 x,1+y,z.

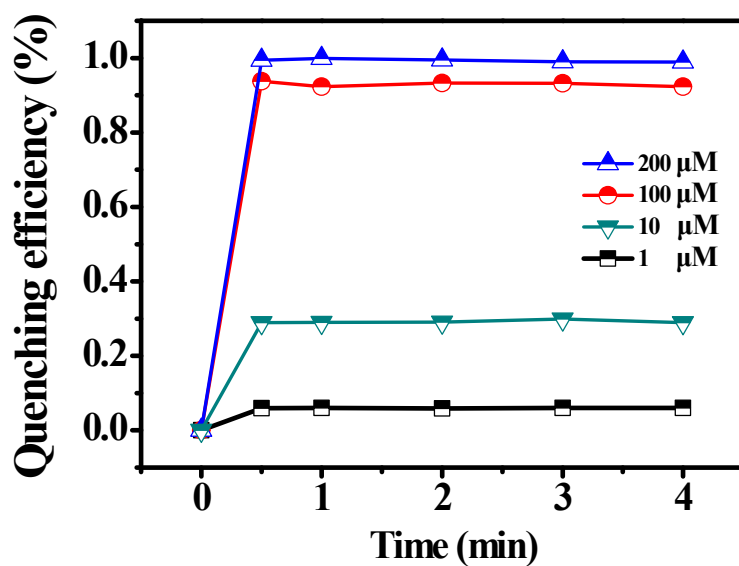

**Fig. 3S** Quenching efficiency of 1-methanol suspension with different concentrations of PA with increasing of time.

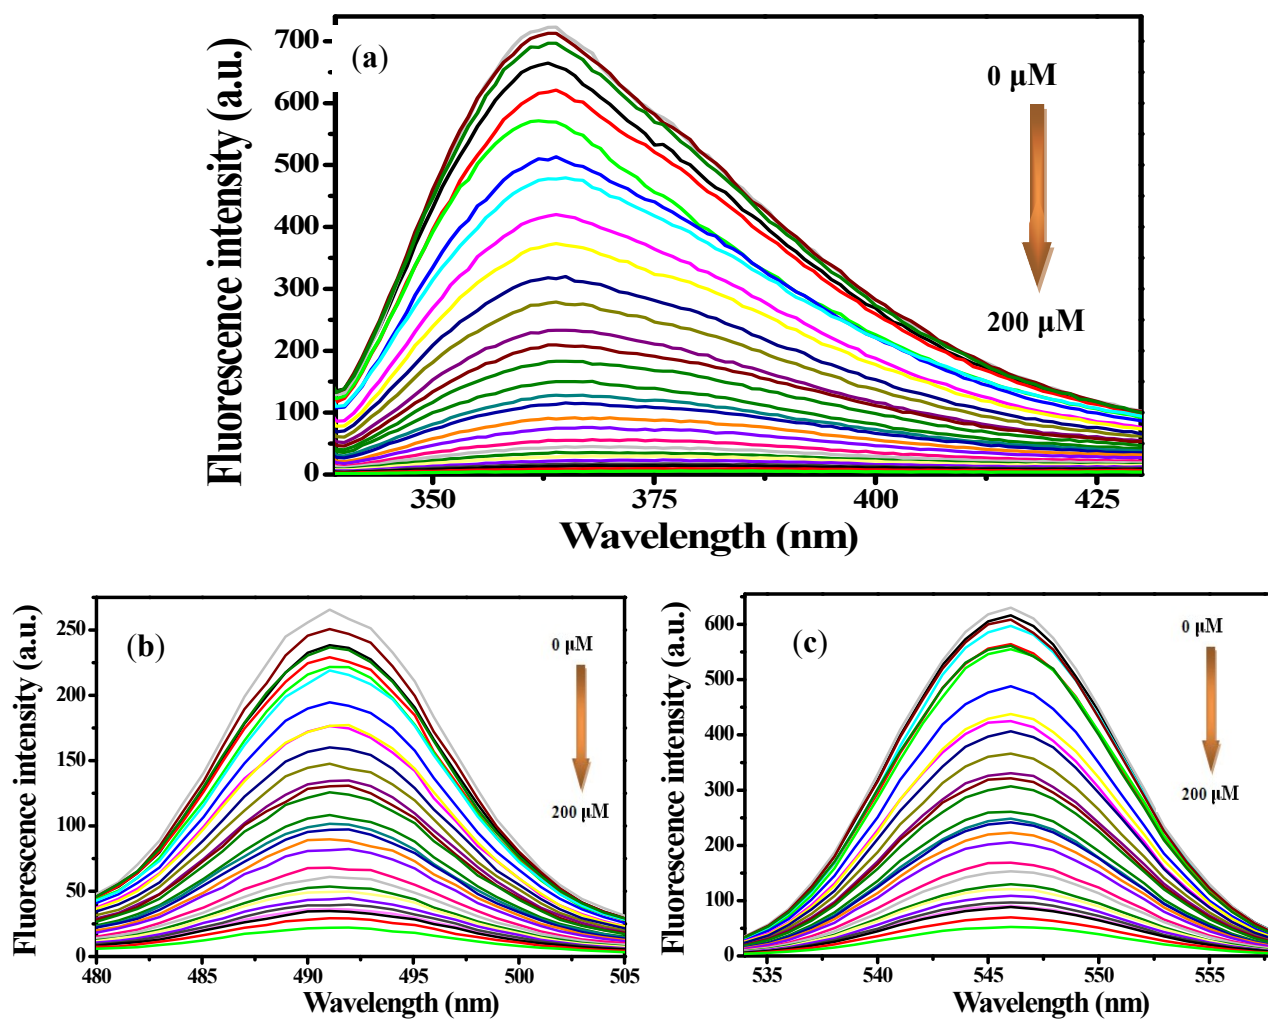

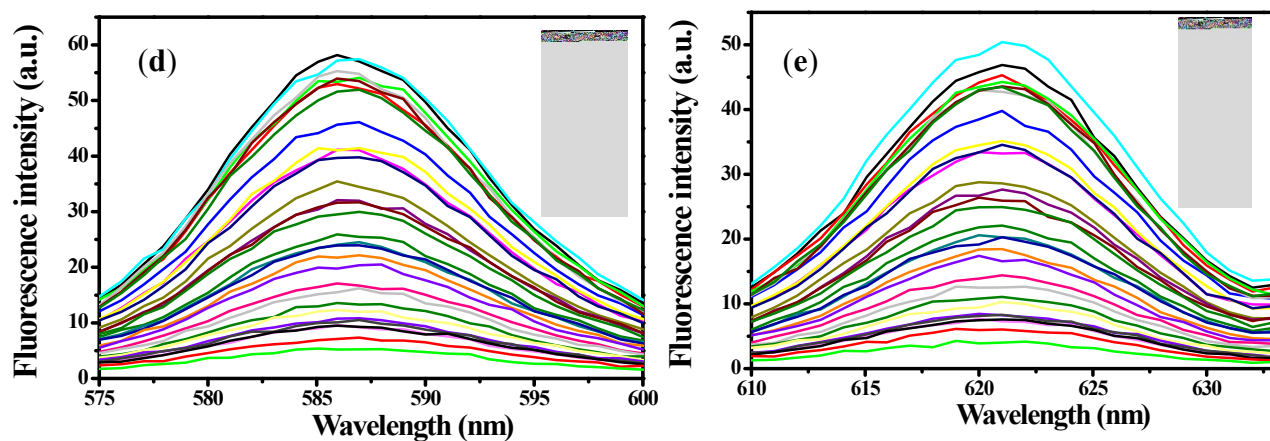

**Fig. 4S** Fluorescence response of **1** towards different concentration of PA in methanol ( $\lambda_{\text{ex}} = 325$  nm,  $\lambda_{\text{em}} = 363$  nm (a),  $\lambda_{\text{em}} = 491$  nm (b),  $\lambda_{\text{em}} = 546$  nm (c),  $\lambda_{\text{em}} = 586$  nm (d),  $\lambda_{\text{em}} = 621$  nm (e); slits: 5 nm/10 nm)

The luminescent lifetime study of the compound has been carried out on an Edinburgh fluorescence spectrophotometer (Edinburgh Instruments FLS920). As shown in Fig. 5S, the luminescent lifetime of the compound is about 0.186 ns.

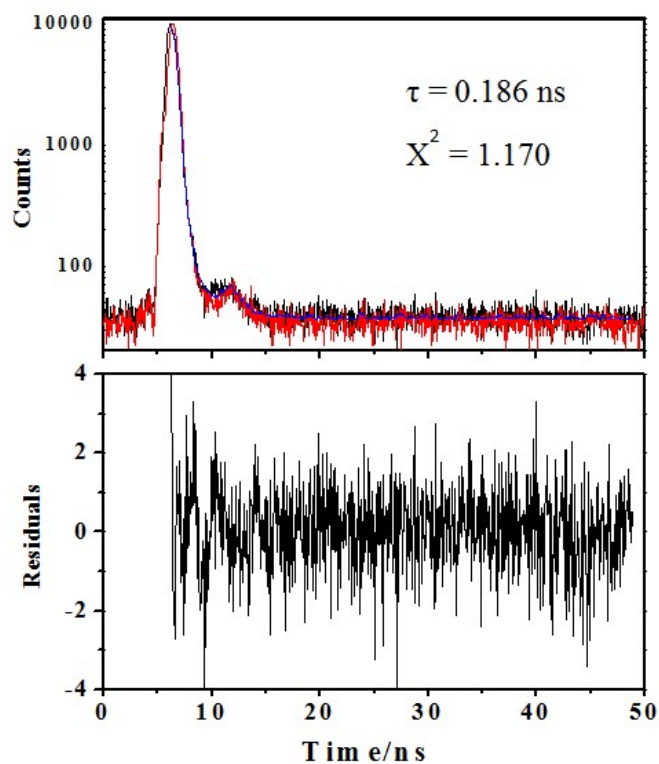

**Fig. 5S** Luminescent lifetime study of the compound **1** ( $\lambda_{\text{ex}} = 325$  nm,  $\lambda_{\text{em}} = 377$  nm).

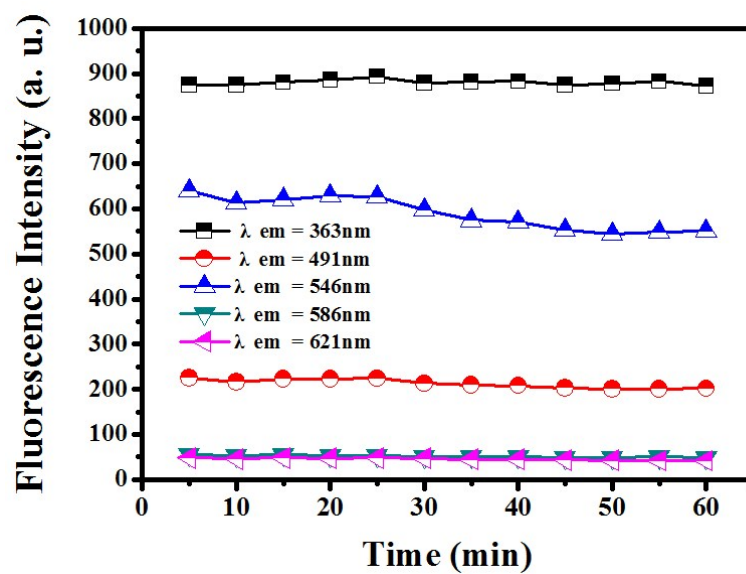

**Fig. 6S** Emission intensity of the 1-methanol suspension with time (the fluorescence spectra were recorded every 5 minutes for 1 hour).
